# Supplementary material for: Genetic Stability of Aedes aegypti Populations following Invasion by wMel Wolbachia
Source: Research Square preprint supplement (doi:10.21203/rs.3.rs-618619/v1), 2021-06-17
Supplement: Supplementary file 1 [file 9acc4e4ab63ca0b232f2e393.xlsx]

## Sheet: Sheet1
ID	Description	GeneRatio	BgRatio	pvalue	p.adjust	qvalue	geneID	Count
aag00232	Caffeine metabolism	6/296	12/3281	0.000296712	0.0323416	0.0315452	5573280/23687731/5573282/5573294/5564528/5575671	6
aag00981	Insect hormone biosynthesis	9/296	40/3281	0.0077845	0.424255	0.413808	5568745/5568746/5568749/5574675/5574682/5568445/5564561/5572855/23687599	9
aag00052	Galactose metabolism	7/296	30/3281	0.0149874	0.544544	0.531134	5571495/5565449/5564133/5564130/5564118/5564116/5564124	7
aag04341	Hedgehog signaling pathway - fly	6/296	25/3281	0.0208105	0.557544	0.543814	5567507/5572653/5573184/5578007/5573069/5573627	6
aag04013	MAPK signaling pathway - fly	14/296	92/3281	0.0341806	0.557544	0.543814	110681501/5569551/5571505/5573380/5573381/5570945/5571277/5568326/5577077/5564563/5572653/5563771/5579293/5579530	14
aag00230	Purine metabolism	14/296	96/3281	0.0468481	0.557544	0.543814	5579456/5571379/5576745/5573280/23687731/5573282/5573294/5574681/5564528/5575671/5577693/5571747/5570561/5564110	14
aag00270	Cysteine and methionine metabolism	6/296	30/3281	0.0477362	0.557544	0.543814	5576532/5569163/5575706/5572853/5566585/5565436	6
aag04624	Toll and Imd signaling pathway	9/296	54/3281	0.0497668	0.557544	0.543814	5564186/5568677/23687476/5571505/5573381/5577660/5578007/5575014/110678029	9
aag00591	Linoleic acid metabolism	3/296	10/3281	0.0540924	0.557544	0.543814	5578548/5572250/110677841	3
aag00250	Alanine, aspartate and glutamate metabolism	6/296	31/3281	0.0548948	0.557544	0.543814	5580112/5580113/5573374/5576532/5576648/5565436	6
aag00040	Pentose and glucuronate interconversions	8/296	47/3281	0.0562659	0.557544	0.543814	5571298/5574566/5566062/5564133/5564130/5564118/5564116/5564124	8
aag00051	Fructose and mannose metabolism	5/296	25/3281	0.0684412	0.583218	0.568856	5564133/5564130/5564118/5564116/5564124	5
aag04711	Circadian rhythm - fly	3/296	11/3281	0.0695581	0.583218	0.568856	5569674/5566219/5567962	3
aag00790	Folate biosynthesis	6/296	34/3281	0.0800655	0.623367	0.608016	5575265/5564133/5564130/5564118/5564116/5564124	6
aag00592	alpha-Linolenic acid metabolism	3/296	12/3281	0.086767	0.630507	0.61498	5578548/5572250/110677841	3
aag04146	Peroxisome	14/296	109/3281	0.109529	0.734144	0.716066	5571503/5571502/5574605/5576648/5573280/23687731/5573282/5573294/5577547/5564528/5575671/5565206/5565426/5564117	14
aag00590	Arachidonic acid metabolism	4/296	21/3281	0.1145	0.734144	0.716066	5579337/5578548/5572250/110677841	4
aag00280	Valine, leucine and isoleucine degradation	7/296	48/3281	0.136548	0.826872	0.806509	5577139/23687831/110676973/5566975/5568558/5578522/5565436	7
aag00760	Nicotinate and nicotinamide metabolism	3/296	15/3281	0.147273	0.844882	0.824076	5568128/5566009/5573757	3
aag00983	Drug metabolism - other enzymes	12/296	97/3281	0.160364	0.856482	0.83539	5564405/5571298/5573280/23687731/5573282/5573294/5564528/5575671/5570159/5571747/5566062/5564110	12
aag04214	Apoptosis - fly	8/296	60/3281	0.168727	0.856482	0.83539	110681501/5570618/5575644/5573178/5572856/5567305/5579530/5574962	8
aag00562	Inositol phosphate metabolism	6/296	42/3281	0.172868	0.856482	0.83539	5571764/5572902/5566784/5568558/5564766/5574784	6
aag00350	Tyrosine metabolism	4/296	27/3281	0.222268	0.944123	0.920873	5576532/5566258/5566259/5578315	4
aag00561	Glycerolipid metabolism	7/296	55/3281	0.223443	0.944123	0.920873	5568692/5568701/5564133/5564130/5564118/5564116/5564124	7
aag04070	Phosphatidylinositol signaling system	7/296	55/3281	0.223443	0.944123	0.920873	5575645/5571764/5573011/5574542/5572902/5566784/5564766	7
aag00520	Amino sugar and nucleotide sugar metabolism	7/296	56/3281	0.23722	0.944123	0.920873	5576373/5571496/5571495/5576723/5574566/5578837/5577482	7
aag04745	Phototransduction - fly	4/296	28/3281	0.242352	0.944123	0.920873	5575645/5572902/5570133/5572723	4
aag04080	Neuroactive ligand-receptor interaction	14/296	126/3281	0.242527	0.944123	0.920873	5570466/5567138/5577569/5569681/5575513/5567970/5567965/5567969/5567968/5567967/5567966/110677015/5567964/5575783	14
aag04320	Dorso-ventral axis formation	4/296	30/3281	0.283615	0.992619	0.968175	5573035/5570618/5567743/5579530	4
aag00510	N-Glycan biosynthesis	5/296	41/3281	0.309093	0.992619	0.968175	5578387/5564391/110674017/5575734/5574793	5
aag00565	Ether lipid metabolism	3/296	22/3281	0.318694	0.992619	0.968175	5578548/5572250/110677841	3
aag00130	Ubiquinone and other terpenoid-quinone biosynthesis	4/296	32/3281	0.32582	0.992619	0.968175	5575570/5575590/5575571/5568557	4
aag00220	Arginine biosynthesis	2/296	14/3281	0.36449	0.992619	0.968175	5573374/5576532	2
aag00910	Nitrogen metabolism	2/296	14/3281	0.36449	0.992619	0.968175	5573374/5565700	2
aag04130	SNARE interactions in vesicular transport	3/296	24/3281	0.36998	0.992619	0.968175	110674421/5576630/110675820	3
aag04120	Ubiquitin mediated proteolysis	10/296	98/3281	0.390035	0.992619	0.968175	5571493/5569672/5571453/5570741/5569036/5567550/5578007/5566596/5573069/110679043	10
aag04136	Autophagy - other	3/296	25/3281	0.395397	0.992619	0.968175	5578996/5571451/5579871	3
aag04215	Apoptosis - multiple species	3/296	25/3281	0.395397	0.992619	0.968175	110681501/5571453/5574962	3
aag00620	Pyruvate metabolism	4/296	36/3281	0.41081	0.992619	0.968175	5567037/5575706/5572254/5564296	4
aag03440	Homologous recombination	3/296	26/3281	0.420537	0.992619	0.968175	5566072/5575440/5575045	3
aag04330	Notch signaling pathway	3/296	26/3281	0.420537	0.992619	0.968175	5573035/5580105/5565937	3
aag00061	Fatty acid biosynthesis	2/296	16/3281	0.430489	0.992619	0.968175	5566981/5578522	2
aag04144	Endocytosis	12/296	124/3281	0.444238	0.992619	0.968175	5566555/5564403/5567507/5573460/5573292/5575446/5566784/5575569/5569700/5564281/5568396/5573069	12
aag03022	Basal transcription factors	4/296	38/3281	0.452618	0.992619	0.968175	5579149/5577539/5573182/5576764	4
aag04350	TGF-beta signaling pathway	4/296	38/3281	0.452618	0.992619	0.968175	5569918/5572653/5573069/5578905	4
aag00640	Propanoate metabolism	3/296	28/3281	0.469677	0.992619	0.968175	5575706/5566975/5568558	3
aag03060	Protein export	3/296	28/3281	0.469677	0.992619	0.968175	5566723/5578008/110678492	3
aag03020	RNA polymerase	3/296	30/3281	0.516869	0.992619	0.968175	5565516/5565337/5565447	3
aag04391	Hippo signaling pathway - fly	5/296	53/3281	0.528207	0.992619	0.968175	110681501/5575644/5577077/5564164/5565517	5
aag00500	Starch and sucrose metabolism	3/296	31/3281	0.539608	0.992619	0.968175	5565513/5573623/5565449	3
aag00970	Aminoacyl-tRNA biosynthesis	4/296	43/3281	0.552089	0.992619	0.968175	5565025/5567972/5566973/5565077	4
aag00513	Various types of N-glycan biosynthesis	3/296	32/3281	0.561724	0.992619	0.968175	5578387/5564391/5574793	3
aag04512	ECM-receptor interaction	2/296	21/3281	0.577529	0.992619	0.968175	5579338/5579856	2
aag01200	Carbon metabolism	9/296	102/3281	0.580391	0.992619	0.968175	5567037/5573374/5576532/5569213/5566975/5568558/5572254/5565206/5571930	9
aag00900	Terpenoid backbone biosynthesis	3/296	33/3281	0.583187	0.992619	0.968175	5565594/5572855/23687599	3
aag00330	Arginine and proline metabolism	4/296	45/3281	0.589143	0.992619	0.968175	5576532/110676788/5572853/110679049	4
aag04150	mTOR signaling pathway	8/296	92/3281	0.59876	0.992619	0.968175	110676274/5569675/5579066/5568063/5564884/5568380/5579530/5572716	8
aag00450	Selenocompound metabolism	1/296	10/3281	0.612038	0.992619	0.968175	5565077	1
aag00564	Glycerophospholipid metabolism	6/296	71/3281	0.629211	0.992619	0.968175	5578658/5573011/5578548/5572250/110677841/5567217	6
aag00340	Histidine metabolism	1/296	11/3281	0.647146	0.992619	0.968175	5571756	1
aag00532	Glycosaminoglycan biosynthesis - chondroitin sulfate / dermatan sulfate	1/296	12/3281	0.679086	0.992619	0.968175	5572904	1
aag00670	One carbon pool by folate	1/296	12/3281	0.679086	0.992619	0.968175	5569213	1
aag00071	Fatty acid degradation	3/296	38/3281	0.680086	0.992619	0.968175	5565282/5566981/5566975	3
aag00053	Ascorbate and aldarate metabolism	3/296	39/3281	0.697329	0.992619	0.968175	5571298/5574566/5566062	3
aag04068	FoxO signaling pathway	5/296	64/3281	0.6981	0.992619	0.968175	5565589/5571451/5569675/5570887/5579530	5
aag04310	Wnt signaling pathway	6/296	77/3281	0.70735	0.992619	0.968175	5573370/5572902/5573184/5578007/5568380/5572716	6
aag03050	Proteasome	3/296	40/3281	0.713861	0.992619	0.968175	5565318/5567581/5568716	3
aag03420	Nucleotide excision repair	3/296	41/3281	0.72969	0.992619	0.968175	5572871/5577539/5576764	3
aag03460	Fanconi anemia pathway	2/296	29/3281	0.751552	0.992619	0.968175	5575045/5572856	2
aag01210	2-Oxocarboxylic acid metabolism	1/296	15/3281	0.758627	0.992619	0.968175	5576532	1
aag00480	Glutathione metabolism	7/296	95/3281	0.767821	0.992619	0.968175	5564405/5579337/5576737/110676788/5572853/5566585/110679049	7
aag04392	Hippo signaling pathway - multiple species	1/296	16/3281	0.780503	0.992619	0.968175	5575644	1
aag00410	beta-Alanine metabolism	2/296	31/3281	0.784088	0.992619	0.968175	5566975/5568558	2
aag00860	Porphyrin and chlorophyll metabolism	3/296	45/3281	0.786208	0.992619	0.968175	5565330/5571298/5566062	3
aag03018	RNA degradation	4/296	59/3281	0.793282	0.992619	0.968175	5578992/5571955/5569047/5579945	4
aag03013	RNA transport	11/296	148/3281	0.79583	0.992619	0.968175	5575266/5566771/5566769/5568340/5566456/5573056/5575707/5577545/5573247/110679365/5569787	11
aag00770	Pantothenate and CoA biosynthesis	1/296	17/3281	0.800402	0.992619	0.968175	5576251	1
aag03008	Ribosome biogenesis in eukaryotes	6/296	86/3281	0.802199	0.992619	0.968175	5566773/110677665/23687857/5578992/5566456/5564643	6
aag00310	Lysine degradation	3/296	47/3281	0.810601	0.992619	0.968175	5563704/5565282/23687649	3
aag00730	Thiamine metabolism	1/296	18/3281	0.818503	0.992619	0.968175	5576745	1
aag03410	Base excision repair	1/296	18/3281	0.818503	0.992619	0.968175	5572871	1
aag04140	Autophagy - animal	6/296	89/3281	0.827959	0.992619	0.968175	5568344/5578996/5571451/5579871/5569675/5573184	6
aag04213	Longevity regulating pathway - multiple species	4/296	63/3281	0.83391	0.992619	0.968175	5571379/5569675/5573184/5570887	4
aag00240	Pyrimidine metabolism	2/296	36/3281	0.849565	0.992619	0.968175	5570159/5564110	2
aag00030	Pentose phosphate pathway	1/296	20/3281	0.849942	0.992619	0.968175	5571930	1
aag00650	Butanoate metabolism	1/296	20/3281	0.849942	0.992619	0.968175	5566975	1
aag04137	Mitophagy - animal	2/296	37/3281	0.860276	0.992619	0.968175	5568344/5565279	2
aag03030	DNA replication	2/296	38/3281	0.870287	0.992619	0.968175	5572871/5564021	2
aag03040	Spliceosome	9/296	135/3281	0.87358	0.992619	0.968175	5564393/5573372/5575759/5575746/5573000/5567973/5575280/5568711/5569796	9
aag01230	Biosynthesis of amino acids	3/296	55/3281	0.885922	0.992619	0.968175	5576532/5572254/5571930	3
aag00010	Glycolysis / Gluconeogenesis	2/296	41/3281	0.896498	0.992619	0.968175	5575706/5574784	2
aag00830	Retinol metabolism	2/296	41/3281	0.896498	0.992619	0.968175	5571298/5566062	2
aag00380	Tryptophan metabolism	1/296	24/3281	0.897465	0.992619	0.968175	5565282	1
aag04145	Phagosome	4/296	76/3281	0.922793	0.992619	0.968175	5569700/5576272/5576245/5576244	4
aag04142	Lysosome	8/296	133/3281	0.924674	0.992619	0.968175	5566555/5567506/5579505/5579510/110674221/5570504/5571106/5574773	8
aag01212	Fatty acid metabolism	4/296	77/3281	0.927434	0.992619	0.968175	5568917/5566981/5566975/5578522	4
aag00982	Drug metabolism - cytochrome P450	3/296	65/3281	0.941965	0.992619	0.968175	5564405/5571298/5566062	3
aag00630	Glyoxylate and dicarboxylate metabolism	1/296	30/3281	0.942137	0.992619	0.968175	5565206	1
aag00980	Metabolism of xenobiotics by cytochrome P450	3/296	66/3281	0.945876	0.992619	0.968175	5564405/5571298/5566062	3
aag00600	Sphingolipid metabolism	1/296	31/3281	0.947406	0.992619	0.968175	5573625	1
aag00020	Citrate cycle (TCA cycle)	1/296	32/3281	0.952196	0.992619	0.968175	5572254	1
aag03015	mRNA surveillance pathway	4/296	88/3281	0.964199	0.992619	0.968175	5566456/5571757/5575707/5577684	4
aag00062	Fatty acid elongation	1/296	36/3281	0.967383	0.992619	0.968175	5568917	1
aag00260	Glycine, serine and threonine metabolism	1/296	36/3281	0.967383	0.992619	0.968175	5565436	1
aag00190	Oxidative phosphorylation	6/296	123/3281	0.972521	0.992619	0.968175	5566654/5571450/5575914/110675198/5568395/5569738	6
aag01040	Biosynthesis of unsaturated fatty acids	1/296	41/3281	0.979788	0.992619	0.968175	5568917	1
aag02010	ABC transporters	1/296	42/3281	0.981635	0.992619	0.968175	5577780	1
aag03010	Ribosome	6/296	142/3281	0.991594	0.992619	0.968175	5566772/5566959/5576744/110675493/110676304/5577478	6
aag04141	Protein processing in endoplasmic reticulum	6/296	144/3281	0.992619	0.992619	0.968175	5578387/5564391/5569672/5569219/5573595/5565441	6
